# Supplementary material
Source: publisher figshare collection journal article supplement (https://rs.figshare.com/ndownloader/files/12559199)
Supplement: Supplementary file 1 [file 12559199]

## Sheet: Main dataset
Dataset: Shoaling preference for the homogeneous and non-homogeneous group
Within-shoal phenotypic homogeneity affects shoaling preference in a killifish; Cattelan Silvia and Griggio Matteo (Department of Biology, University of Padova, Italy)
trial	homogeneous_bars	stimulus_ID	focal_bars	stimulus	central	choosing	prop_choosing	preference	prop_preference
1	7	s6	9	NH	232	668	0.742222	512	0.766467
10	11	s4	9	NH	266	634	0.704444	281	0.443218
11	12	s2	10	NH	192	708	0.786667	313	0.44209
12	11	s3	9	NH	85	815	0.905556	349	0.428221
13	7	s6	9	NH	235	665	0.738889	280	0.421053
14	10	s9	11	NH	167.5	732.5	0.813889	215.5	0.255905
15	11	s3	9	NH	177	723	0.803333	245	0.322817
16	11	s4	9	NH	261	639	0.71	231	0.361502
17	7	s7	9	NH	116.5	783.5	0.870556	283	0.3612
18	9	s5	10	NH	280.5	619.5	0.688333	222.5	0.359161
19	8	s1	9	NH	161.6	737.6	0.819556	239	0.323673
2	9	s5	10	NH	155	745	0.827778	481	0.645638
20	11	s4	9	NH	383	517	0.574444	161	0.311412
21	10	s9	11	NH	131.5	768.5	0.853889	143.5	0.16486
22	9	s8	10	NH	326	574	0.637778	261	0.607532
23	10	s9	11	NH	268	632	0.702222	159	0.251582
24	9	s8	10	NH	129	771	0.856667	186	0.241245
3	12	s2	10	NH	270	630	0.7	404	0.64127
4	7	s7	9	NH	134	766	0.851111	457	0.596606
5	11	s3	9	NH	279	621	0.69	359	0.60517
6	12	s2	10	NH	207	693	0.77	368	0.531025
7	8	s1	9	NH	202.9	695.9	0.773222	358.3	0.513987
8	8	s1	9	NH	170.3	729.3	0.810333	374.3	0.512951
9	9	s8	10	NH	305	595	0.661111	269	0.452101
1	7	s6	9	H	232	668	0.742222	156	0.233533
10	11	s4	9	H	266	634	0.704444	353	0.556782
11	12	s2	10	H	192	708	0.786667	395	0.55791
12	11	s3	9	H	85	815	0.905556	466	0.571779
13	7	s6	9	H	235	665	0.738889	385	0.578947
14	10	s9	11	H	167.5	732.5	0.813889	517	0.613935
15	11	s3	9	H	177	723	0.803333	478	0.629822
16	11	s4	9	H	261	639	0.71	408	0.638498
17	7	s7	9	H	116.5	783.5	0.870556	500.5	0.6388
18	9	s5	10	H	280.5	619.5	0.688333	397	0.640839
19	8	s1	9	H	161.6	737.6	0.819556	498.6	0.675244
2	9	s5	10	H	155	745	0.827778	264	0.354362
20	11	s4	9	H	383	517	0.574444	356	0.688588
21	10	s9	11	H	131.5	768.5	0.853889	625	0.718032
22	9	s8	10	H	326	574	0.637778	313	0.728573
23	10	s9	11	H	268	632	0.702222	473	0.748418
24	9	s8	10	H	129	771	0.856667	585	0.758755
3	12	s2	10	H	270	630	0.7	226	0.35873
4	7	s7	9	H	134	766	0.851111	309	0.403394
5	11	s3	9	H	279	621	0.69	262	0.441656
6	12	s2	10	H	207	693	0.77	325	0.468975
7	8	s1	9	H	202.9	695.9	0.773222	337.6	0.484292
8	8	s1	9	H	170.3	729.3	0.810333	355	0.486501
9	9	s8	10	H	305	595	0.661111	326	0.547899
